# Supplementary material for: SMaRT lncRNA controls translation of a G‐quadruplex‐containing mRNA antagonizing the DHX36 helicase
Source: PubMed Central journal article supplement (PMC7271651; doi:10.15252/embr.201949942), 2020-04-26
Supplement: EMBR-21-e49942-s010.pdf [file EMBR-21-e49942-s010.pdf]

Uncropped Western Blot files Figure 2

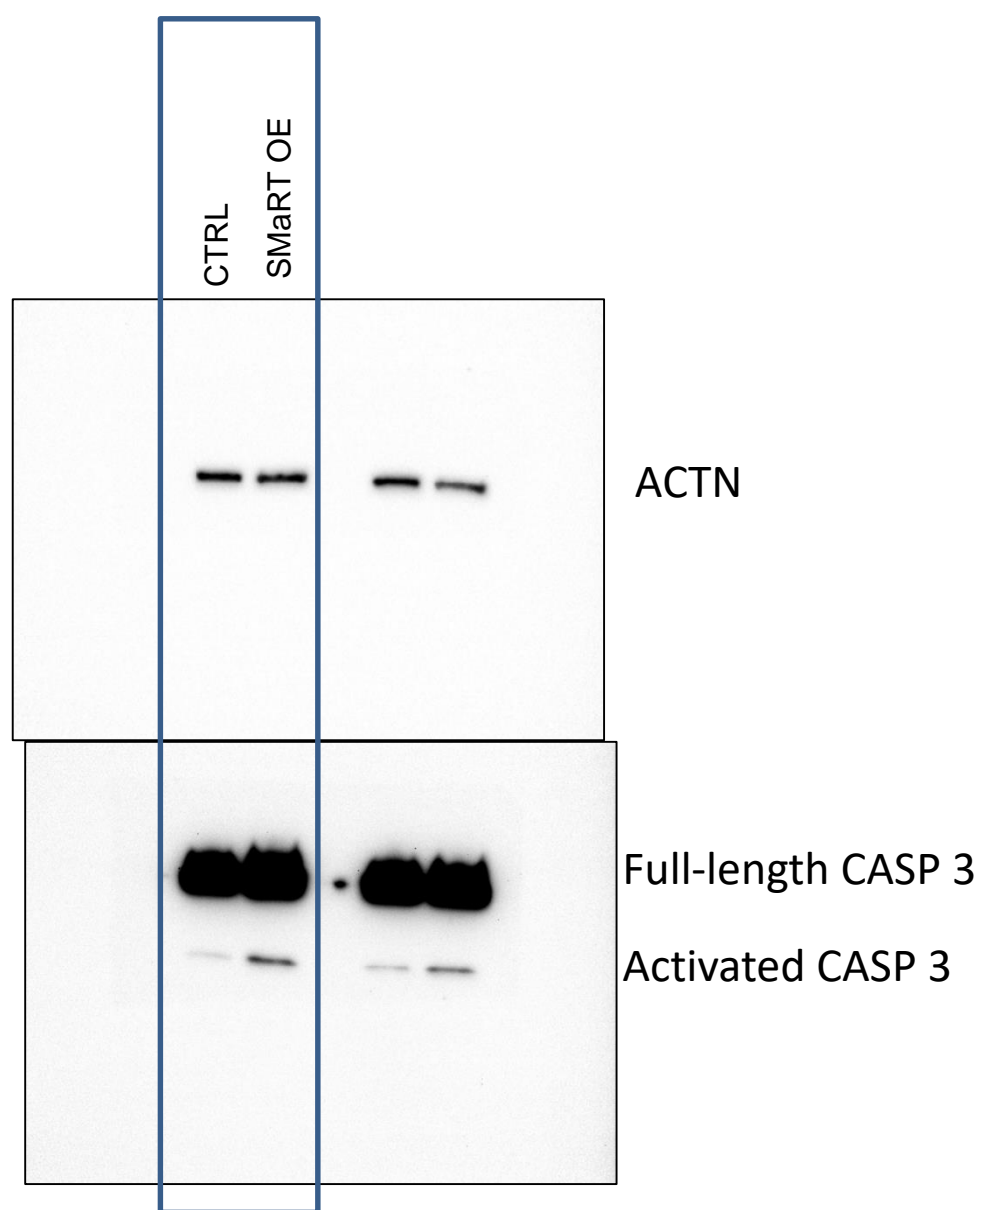

FIGURE 2D
